# Supplementary material for: In situ synthesis of TiO2/NC on cotton fibers with antibacterial properties and recyclable photocatalytic degradation of dyes
Source: Royal Society of Chemistry journal article supplement (doi:10.1039/d2ra00992g), 2022-01-01
Supplement: d2ra00992g1.pdf [file d2ra00992g1.pdf]

## Supporting Information

### **In-situ synthesis of TiO<sub>2</sub>/NC on cotton fibers with antibacterial properties and reusable photocatalytic degradation of dyes**

Wei Chen<sup>a</sup>, Xiaolin Feng<sup>b</sup>, Danying Zhang<sup>b</sup>, Fangfang Lu<sup>c</sup>, Hairong Wang<sup>c</sup>, Jiachen Tan<sup>b</sup>, Qiao Xu<sup>a,b</sup>,  
Yongkun Liu<sup>b</sup>, Zhihai Cao<sup>\*a</sup>, Xiuping Su<sup>\*a,b</sup>

a. Key Laboratory of Advanced Textile Materials and Manufacturing Technology and Engineering Research Center for Eco-Dyeing & Finishing of Textiles, Ministry of Education, Zhejiang Sci-Tech University, Hangzhou 310018, P. R. China

b. Shaoxing University Yuanpei College, Shaoxing Zhejiang 312000, China

c. Zhoushan Institute of Calibration and Testing for Quality and Technology Supervision, Zhoushan Zhejiang 316000, China

**\*Corresponding author:**

**Professor Xiuping Su**

**Email:** [suxiuping@usx.edu.cn](mailto:suxiuping@usx.edu.cn); [suxiuping0577@163.com](mailto:suxiuping0577@163.com)

## **Contents**

Fig. S1 The element mapping image of TiO<sub>2</sub>@Cot (left) and original bare cotton fibers (right)

Fig S2 The FESEM of TiO<sub>2</sub>@Cot before and after photocatalytic recycling

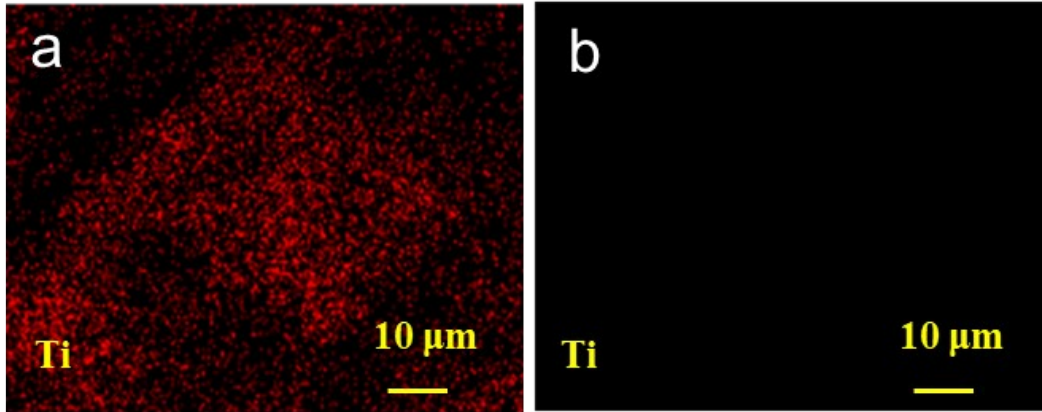

Fig. S1 The element mapping image of  $\text{TiO}_2@\text{Cot}$  (a) and the original bare cotton fibers (b)

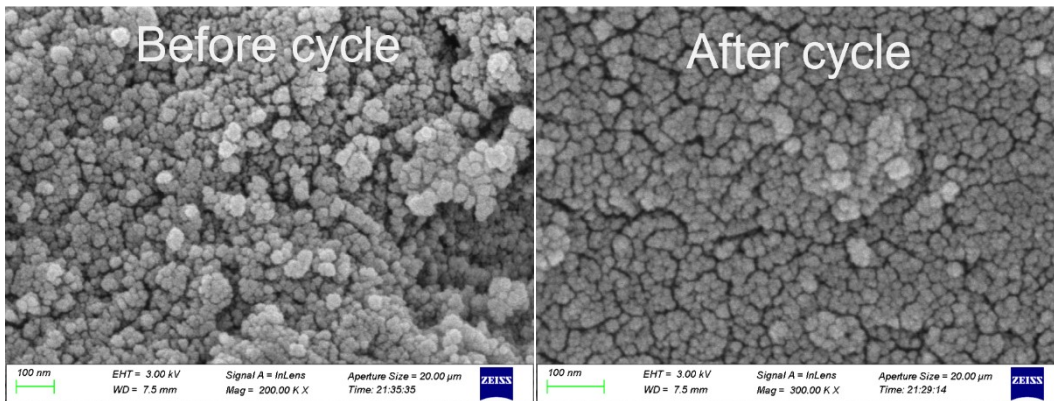

Fig. S2 The FESEM of  $\text{TiO}_2@\text{Cot}$  before and after photocatalytic recycling
